# Supplementary material for: Therapeutic Potential of Regorafenib in Cisplatin-Resistant Bladder Cancer with High Epithelial–Mesenchymal Transition and Stemness Properties
Source: MDPI journal article supplement (doi:10.3390/ijms242417610), 2023-12-18
Supplement: s1 [file s1]

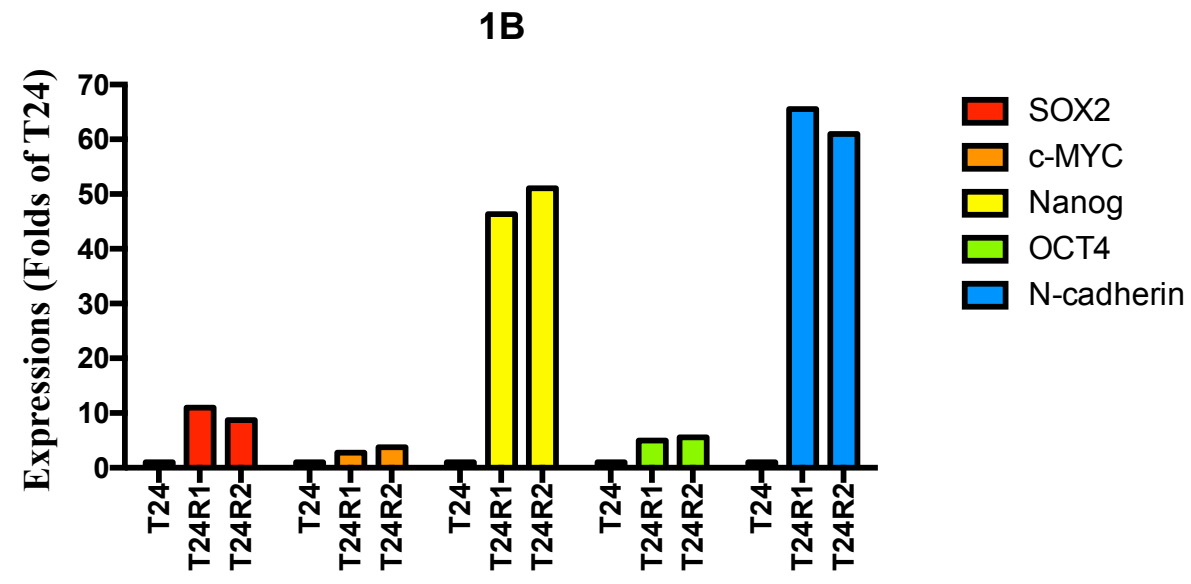

**Supplemental Figure 1.**  
Quantification plot of Figure 1B.

(A)

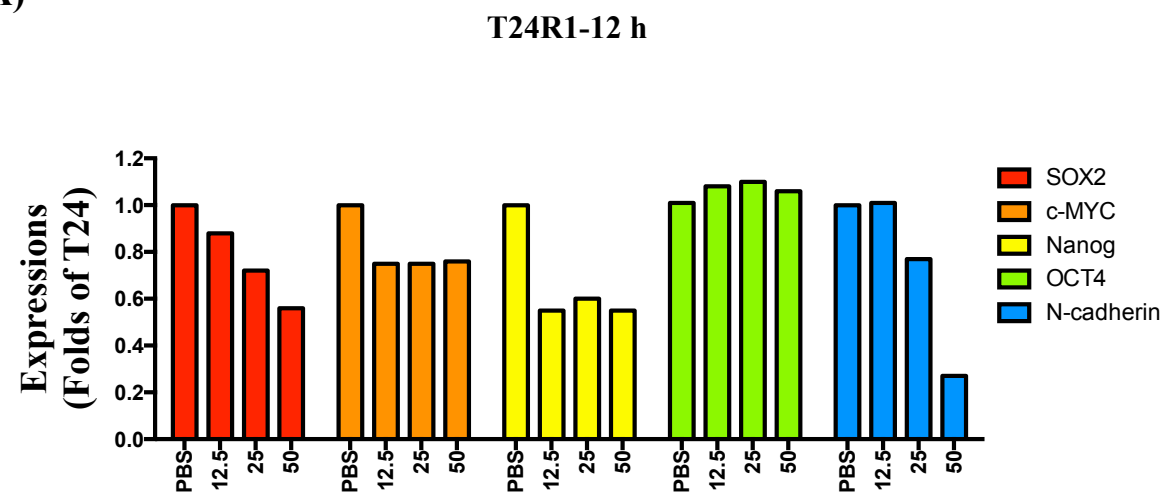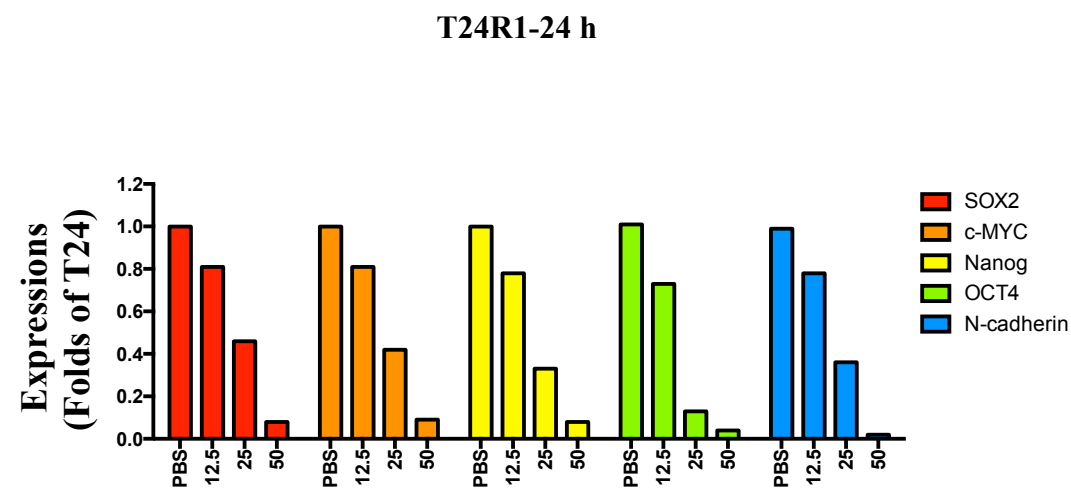

(B)

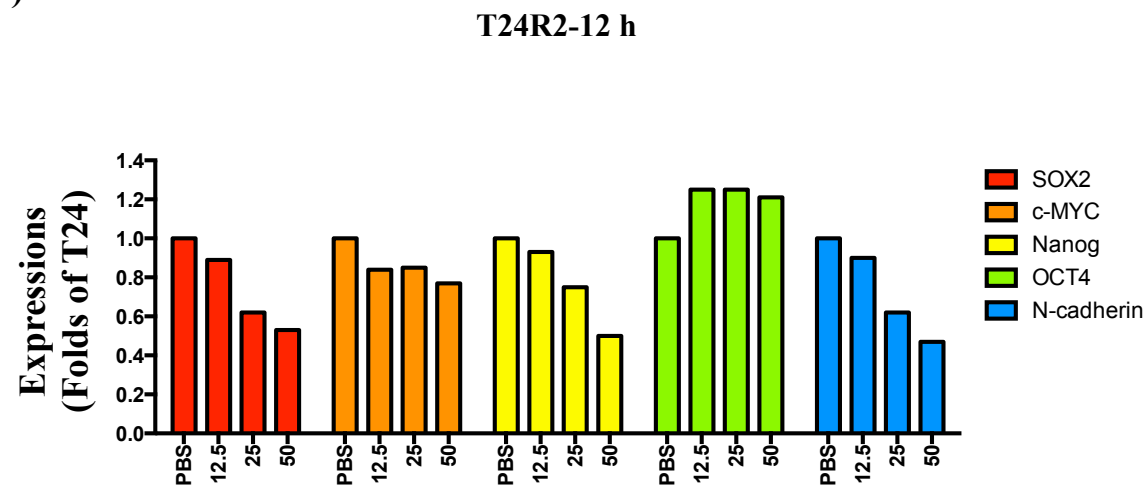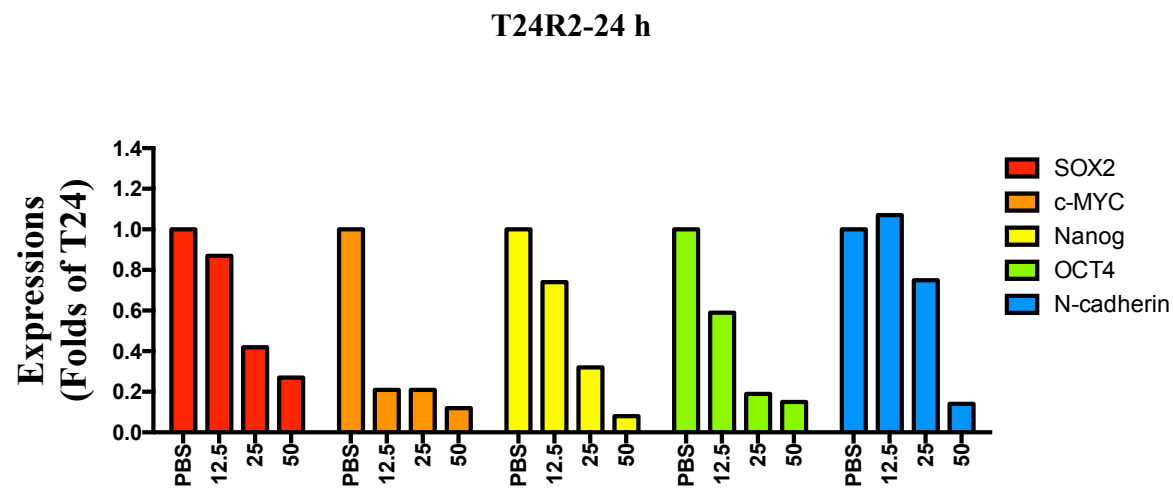

**Supplemental Figure 2.**  
Quantification plot of Figure 2E.

(A)

T24R1-12 h

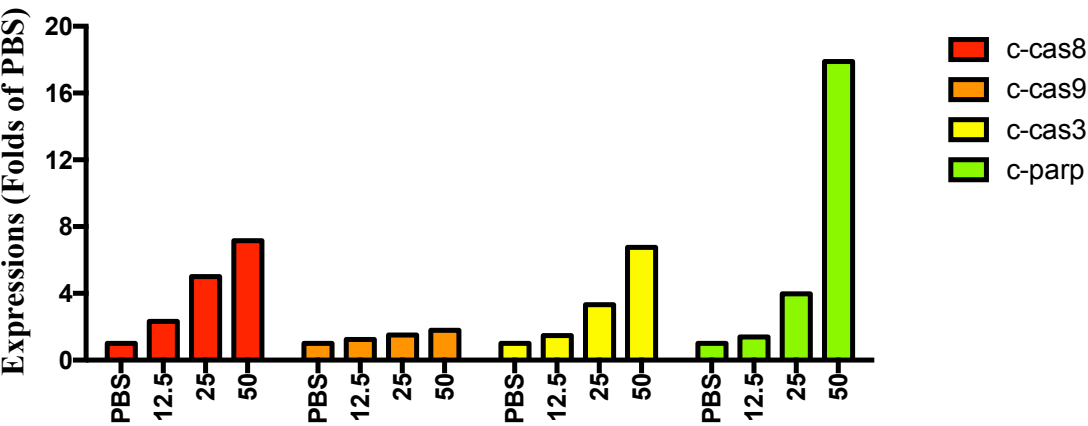

T24R1-24 h

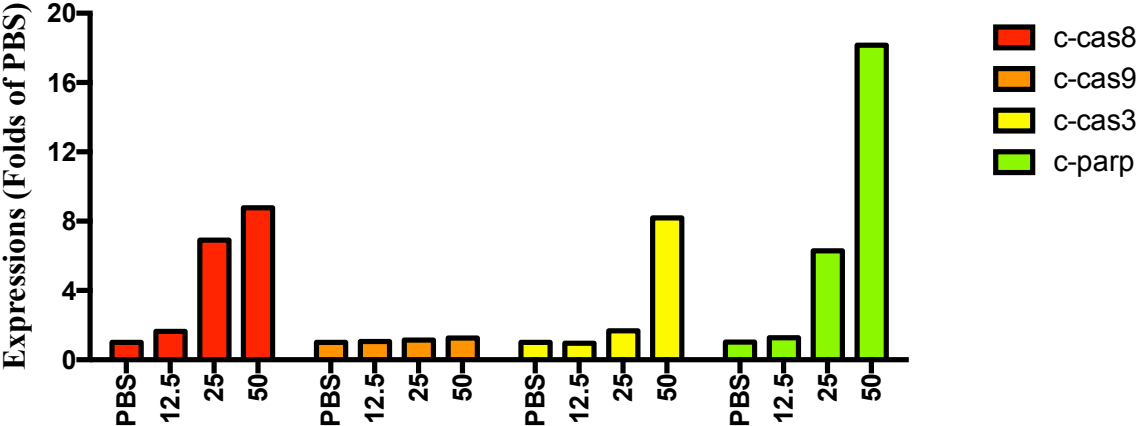

(B)

T24R2-12 h

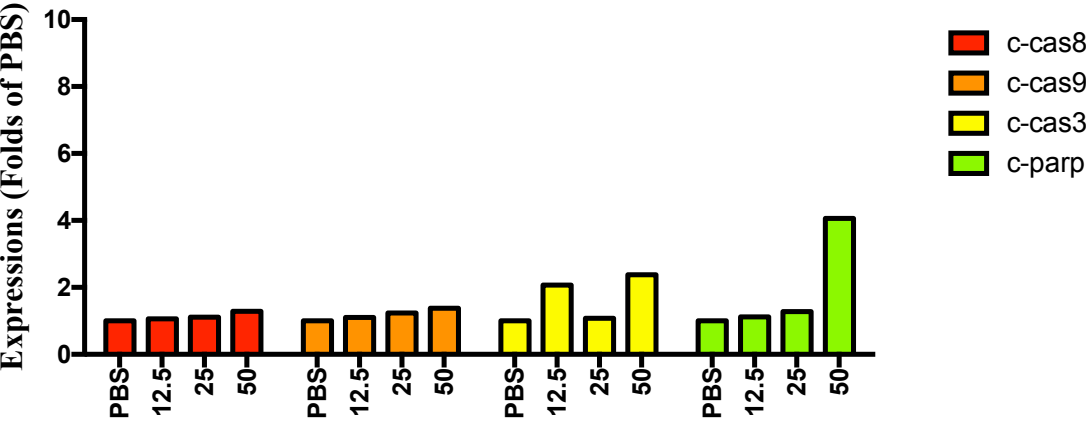

T24R2-24 h

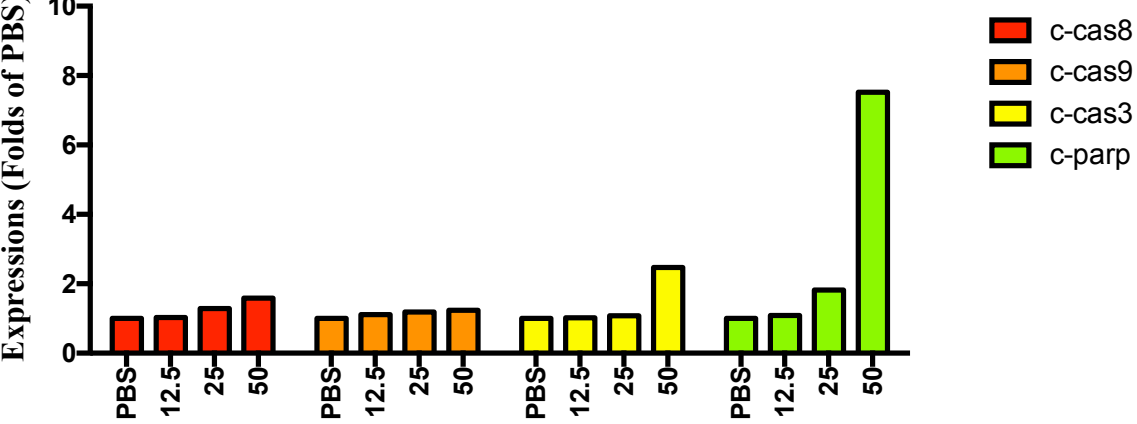

**Supplemental Figure 3.**  
Quantification plot of Figure 4B.

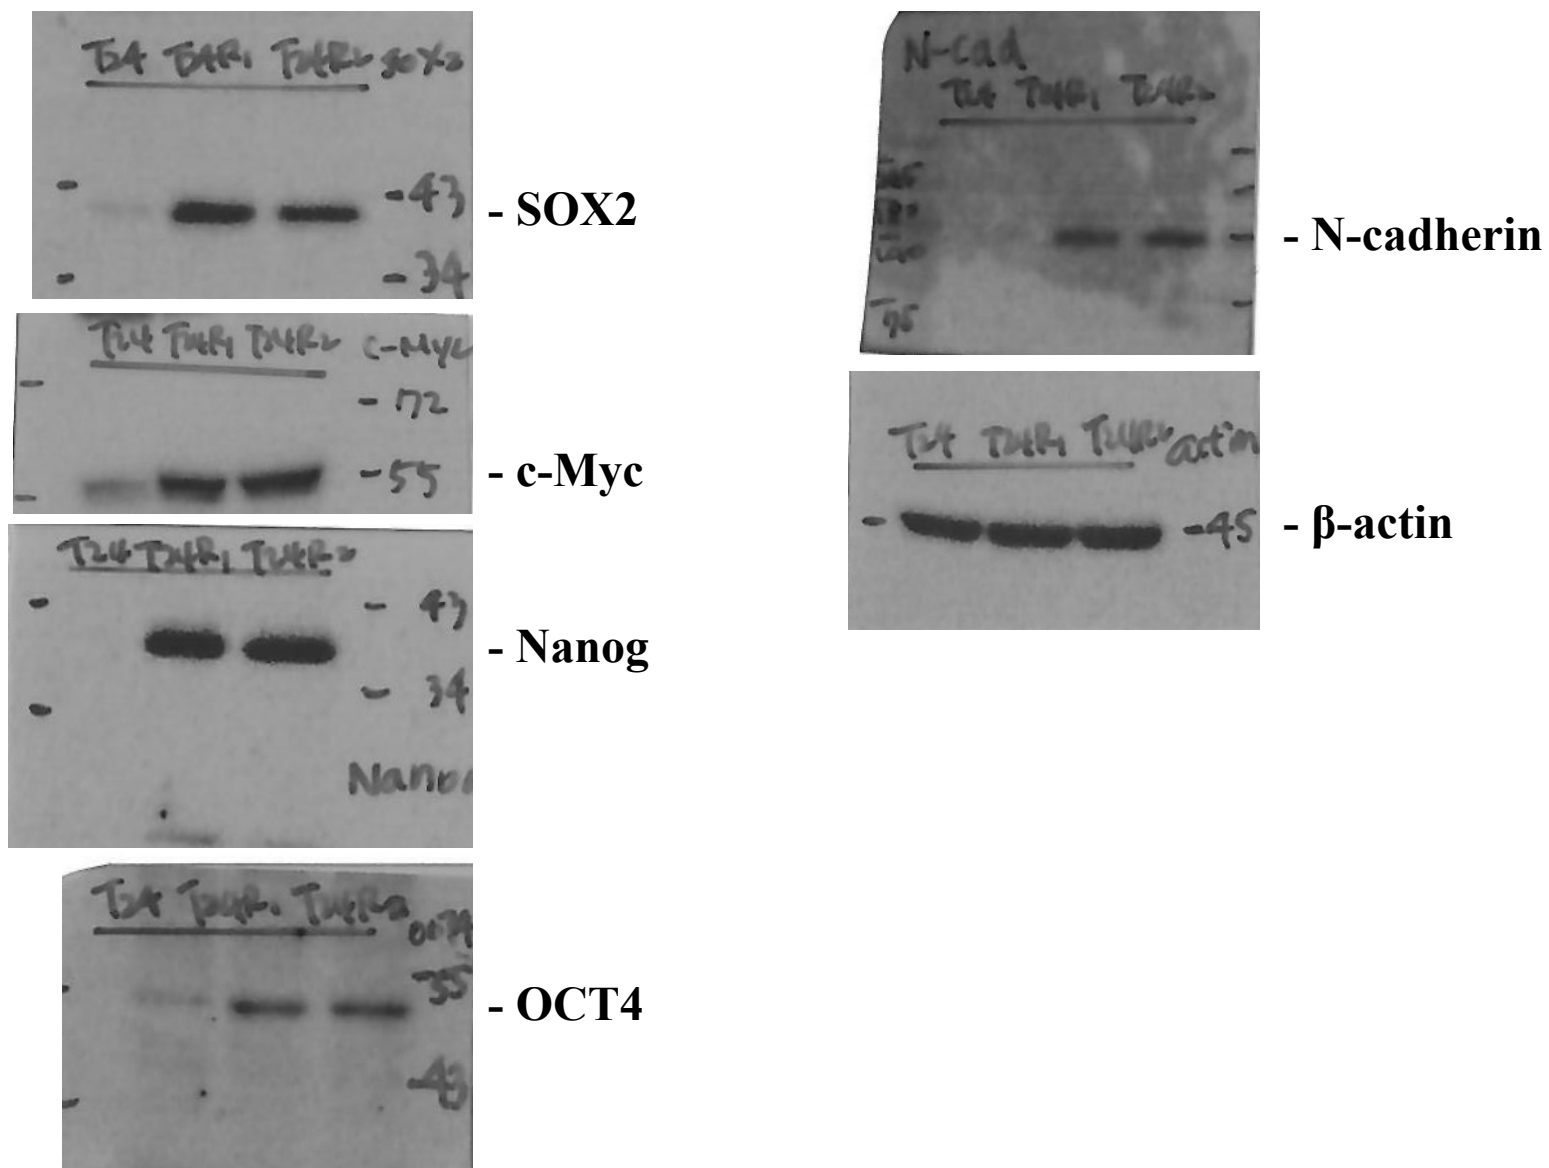

**Supplemental Figure 4.**  
Raw data of Figure 1B.

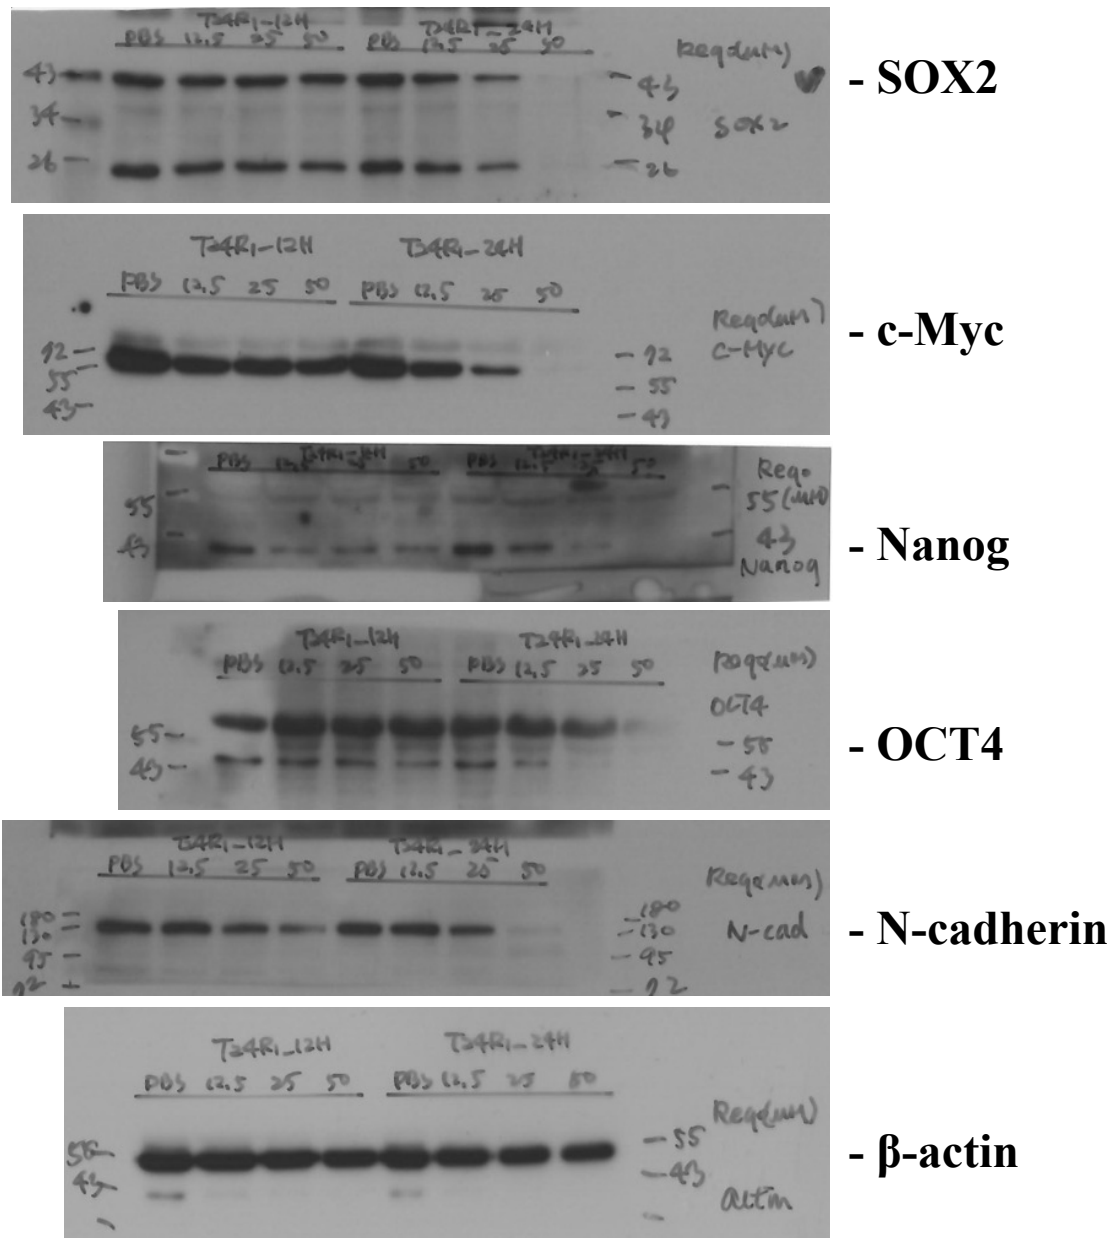

**Supplemental Figure 5.**  
T24R1 raw data of Figure 2E.

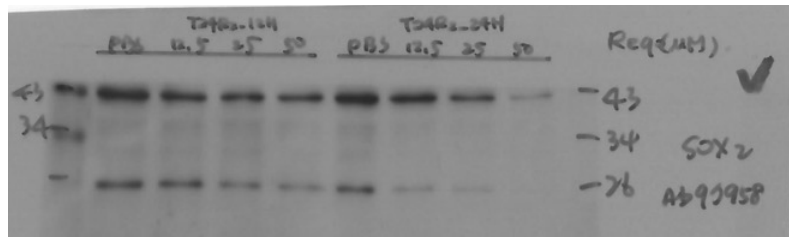

- SOX2

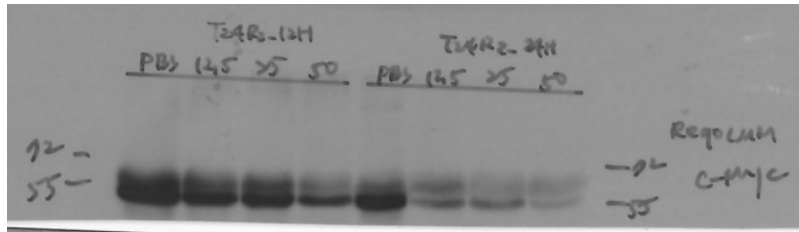

- c-Myc

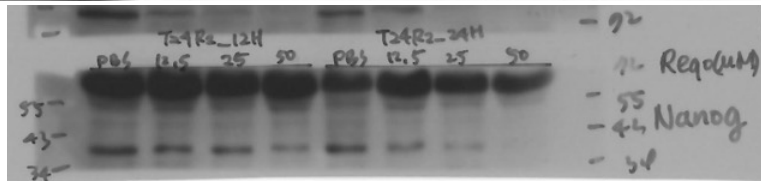

- Nanog

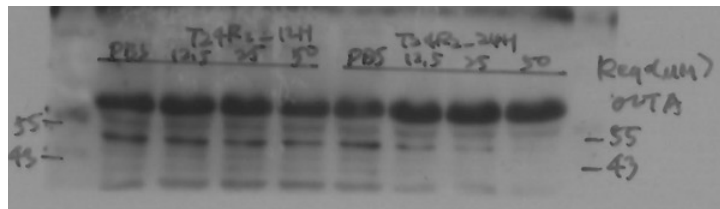

- OCT4

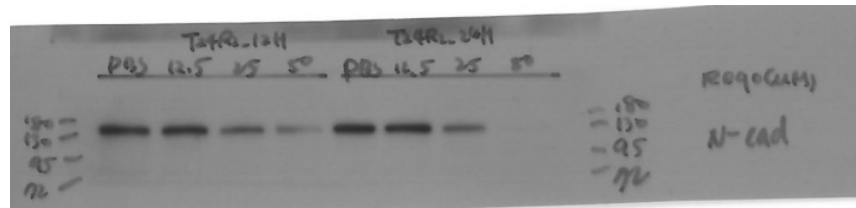

- N-cadherin

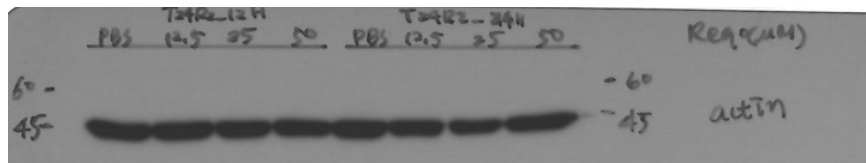

-  $\beta$ -actin

**Supplemental Figure 5.**  
T24R2 raw data of Figure 2E.

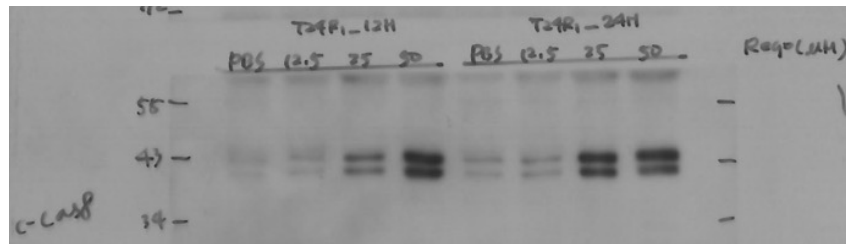

- cleaved-Cas8

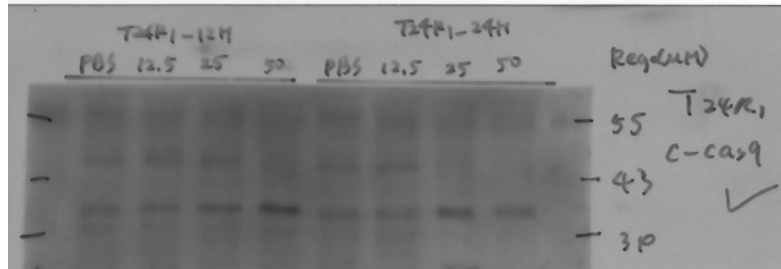

- cleaved-Cas9

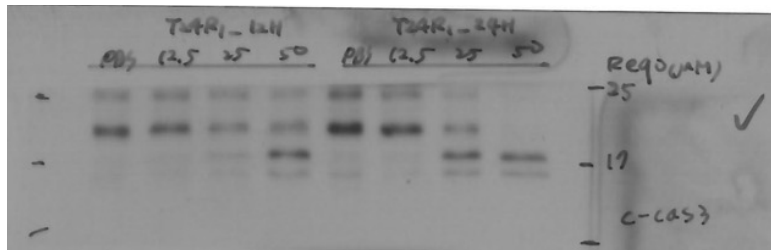

- cleaved-Cas3

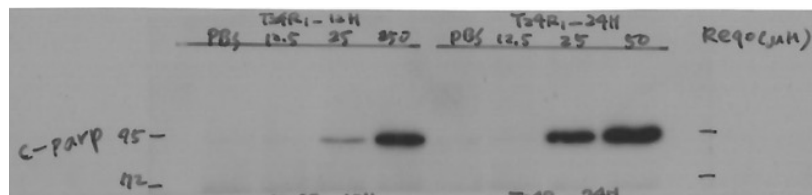

- c-PARP

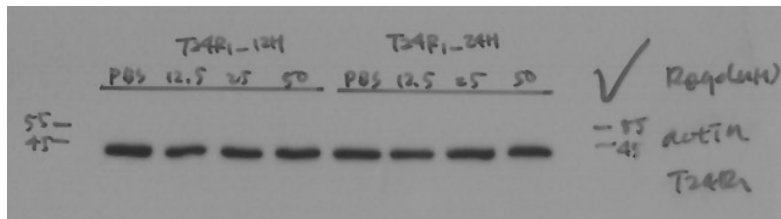

-  $\beta$ -actin

**Supplemental Figure 6.**  
T24R1 raw data of Figure 4B.

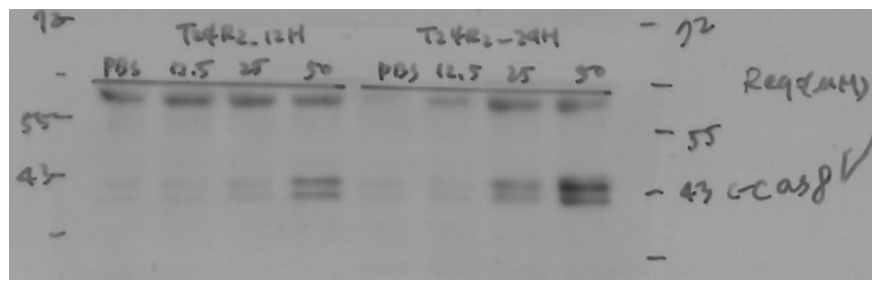

- cleaved-Cas8 ✓

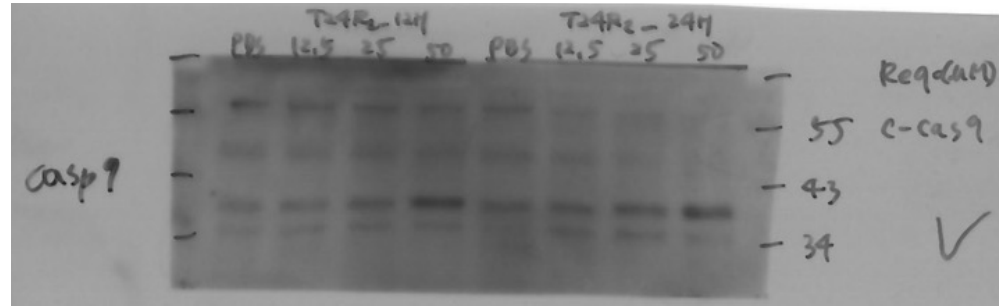

- cleaved-Cas9 ✓

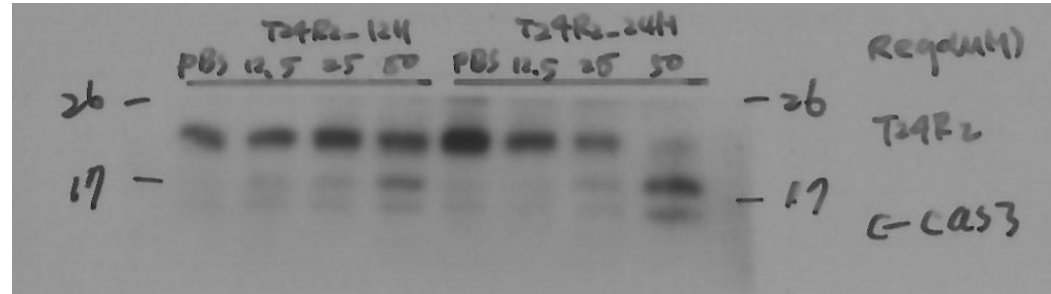

- cleaved-Cas3

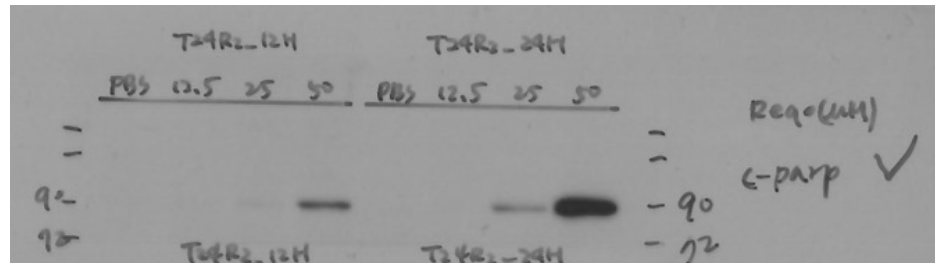

- c-PARP ✓

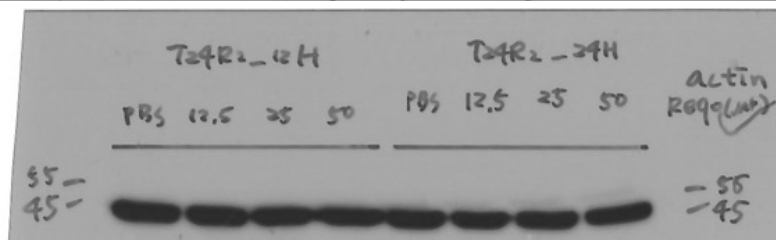

- β-actin

**Supplemental Figure 6.**  
T24R2 raw data of Figure 4B.



# T24R1

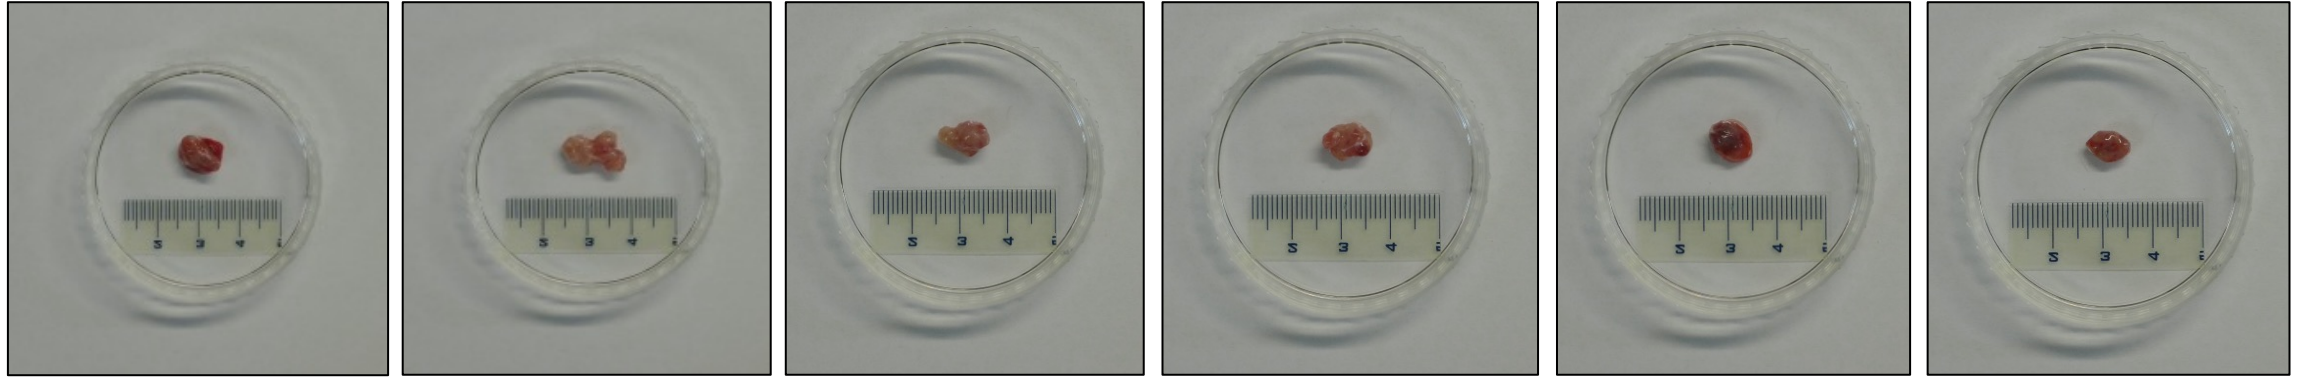

PBS-1

PBS-2

PBS-3

PBS-4

PBS-5

PBS-6

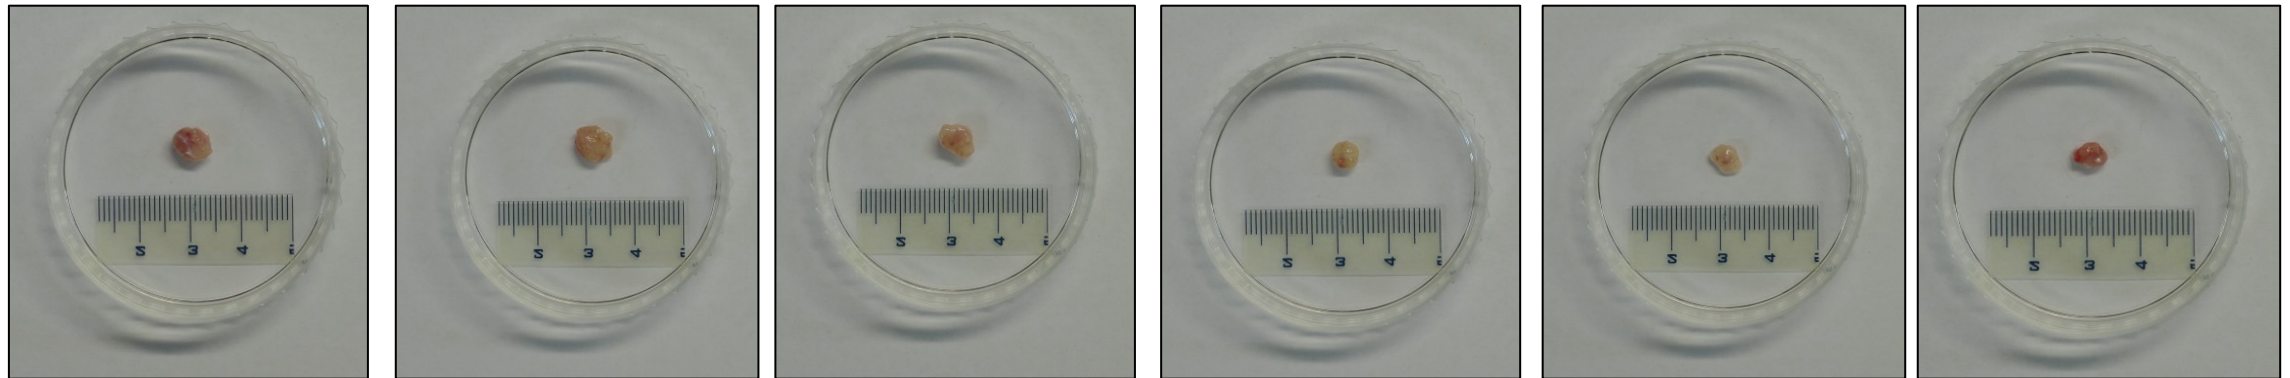

Regorafenib-1

Regorafenib-2

Regorafenib-3

Regorafenib-4

Regorafenib-5

Regorafenib-6

# T24R2

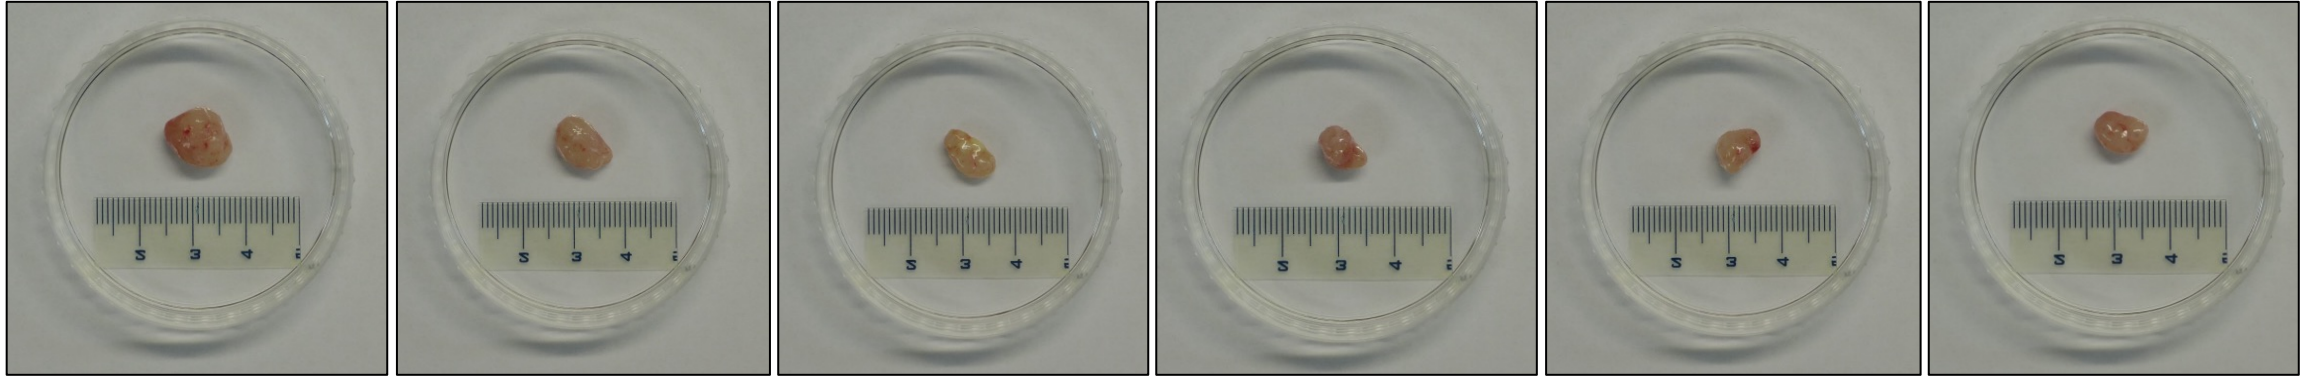

PBS-1

PBS-2

PBS-3

PBS-4

PBS-5

PBS-6

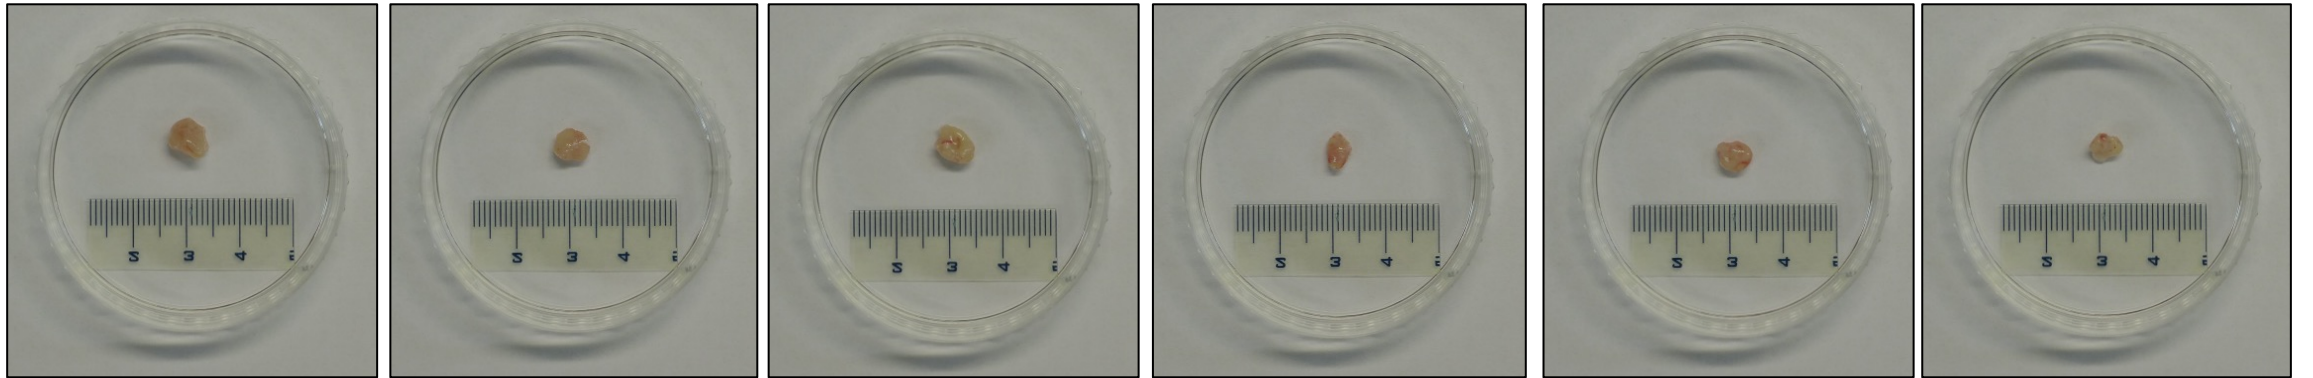

Regorafenib-1

Regorafenib-2

Regorafenib-3

Regorafenib-4

Regorafenib-5

Regorafenib-6
